# Supplementary material for: A New Measure of the Revised Reinforcement Sensitivity Theory
Source: Atypon-hosted journal article supplement (doi:10.1027/1864-9335/a000502), 2022-11-01
Supplement: 1864-9335_a000502_esm1.pdf [file 1864-9335_a000502_esm1.pdf]

## **A new measure of the revised reinforcement sensitivity theory: factor structure and validity of the rRST-Q in the PATH through life project**

### **Supplement Methods**

#### **Confirmatory factor analysis with no inter-factor correlations using *lavaan***

# Model definition:

```
rst_model_ncor <- 'r_BIS =~ rst2_w5 + rst4_w5 + rst7_w5 + rst8_w5 + rst11_w5
                  + rst21_w5R + rst23_w5 + rst26_w5 + rst28_w5
                  + rst29_w5 + rst30_w5
r_BAS =~ rst1_w5 + rst5_w5 + rst12_w5 + rst13_w5
                  + rst18_w5 + rst24_w5 + rst25_w5 + rst31_w5
r_FFFS_fr =~ rst3_w5 + rst9_w5R + rst10_w5 + rst14_w5
r_FFFS_fl =~ rst6_w5 + rst19_w5 + rst20_w5
r_FFFS_fi =~ rst15_w5R + rst16_w5R + rst17_w5 + rst22_w5
                  + rst27_w5
# Interfactor correlations
r_BIS ~~ 0*r_BAS + 0*r_FFFS_fr + 0*r_FFFS_fl
          + 0*r_FFFS_fi
r_BAS ~~ 0*r_FFFS_fr + 0*r_FFFS_fl + 0*r_FFFS_fi
r_FFFS_fr ~~ 0*r_FFFS_fl + 0*r_FFFS_fi
r_FFFS_fl ~~ 0*r_FFFS_fi'
```

# Run CFA model:

```
fit_rst_model_ncor <- cfa(rst_model_ncor, data = path_w5, ordered =
c("rst2_w5", "rst4_w5", "rst7_w5", "rst8_w5", "rst11_w5", "rst21_w5R",
"rst23_w5", "rst26_w5", "rst28_w5", "rst29_w5", "rst30_w5", "rst1_w5",
"rst5_w5", "rst12_w5", "rst13_w5", "rst18_w5", "rst24_w5", "rst25_w5",
"rst31_w5", "rst15_w5R", "rst16_w5R", "rst17_w5", "rst22_w5", "rst27_w5",
"rst6_w5", "rst19_w5", "rst20_w5", "rst3_w5", "rst9_w5R", "rst10_w5",
"rst14_w5"), parameterization = "theta", mimic = "Mplus")
```

# show fit measures:

```
summary(fit_rst_model_ncor, fit.measures = TRUE)
```

## Confirmatory factor analysis with restricted factor correlations to subscales using *lavaan*

# Model definition:

```
rst_model_cons <- 'r_BIS =~ rst2_w5 + rst4_w5 + rst7_w5 + rst8_w5 + rst11_w5
                  + rst21_w5R + rst23_w5 + rst26_w5 + rst28_w5
                  + rst29_w5 + rst30_w5
                  r_BAS =~ rst1_w5 + rst5_w5 + rst12_w5 + rst13_w5
                  + rst18_w5 + rst24_w5 + rst25_w5 + rst31_w5
                  r_FFFS_fr =~ rst3_w5 + rst9_w5R + rst10_w5 + rst14_w5
                  r_FFFS_fl =~ rst6_w5 + rst19_w5 + rst20_w5
                  r_FFFS_fi =~ rst15_w5R + rst16_w5R + rst17_w5 + rst22_w5
                  + rst27_w5
                  # Interfactor correlations
                  r_BIS ~~ 0*r_BAS + 0*r_FFFS_fr + 0*r_FFFS_fl
                  + 0*r_FFFS_fi
                  r_BAS ~~ 0*r_FFFS_fr + 0*r_FFFS_fl + 0*r_FFFS_fi
                  r_FFFS_fr ~~ r_FFFS_fl + r_FFFS_fi
                  r_FFFS_fl ~~ r_FFFS_fi'
```

# Run CFA model:

```
fit_rst_model_cons <- cfa(rst_model_cons, data = path_w5, ordered =
c("rst2_w5", "rst4_w5", "rst7_w5", "rst8_w5", "rst11_w5", "rst21_w5R",
"rst23_w5", "rst26_w5", "rst28_w5", "rst29_w5", "rst30_w5", "rst1_w5",
"rst5_w5", "rst12_w5", "rst13_w5", "rst18_w5", "rst24_w5", "rst25_w5",
"rst31_w5", "rst15_w5R", "rst16_w5R", "rst17_w5", "rst22_w5", "rst27_w5",
"rst6_w5", "rst19_w5", "rst20_w5", "rst3_w5", "rst9_w5R", "rst10_w5",
"rst14_w5"), parameterization = "theta", mimic = "Mplus")
```

# Show fit measures:

```
summary(fit_rst_model_cons, fit.measures = TRUE)
```

### **Confirmatory factor analysis with free inter-factor correlations using *lavaan***

# Model definition:

```
rst_model_free <- 'rBIS =~ rst2_w5 + rst4_w5 + rst7_w5 + rst8_w5 + rst11_w5
                  + rst21_w5R + rst23_w5 + rst26_w5 + rst28_w5
                  + rst29_w5 + rst30_w5
rBAS =~ rst1_w5 + rst5_w5 + rst12_w5 + rst13_w5
        + rst18_w5 + rst24_w5 + rst25_w5 + rst31_w5
rFFFS_fi =~ rst15_w5R + rst16_w5R + rst17_w5 + rst22_w5
           + rst27_w5
rFFFS_f1 =~ rst6_w5 + rst19_w5 + rst20_w5
rFFFS_fr =~ rst3_w5 + rst9_w5R + rst10_w5 + rst14_w5a
# Interfactor correlations
rBIS ~~ rBAS + rFFFS_fi + rFFFS_f1 + rFFFS_fr
rBAS ~~ rFFFS_fi + rFFFS_f1 + rFFFS_fr
rFFFS_fi ~~ rFFFS_f1 + rFFFS_fr
rFFFS_f1 ~~ rFFFS_fr'
```

# Run CFA model:

```
fit_rst_model_free <- cfa(rst_model_free, data = path_w5, ordered =
c("rst2_w5", "rst4_w5", "rst7_w5", "rst8_w5", "rst11_w5", "rst21_w5R",
"rst23_w5", "rst26_w5", "rst28_w5", "rst29_w5", "rst30_w5", "rst1_w5",
"rst5_w5", "rst12_w5", "rst13_w5", "rst18_w5", "rst24_w5", "rst25_w5",
"rst31_w5", "rst15_w5R", "rst16_w5R", "rst17_w5", "rst22_w5", "rst27_w5",
"rst6_w5", "rst19_w5", "rst20_w5", "rst3_w5", "rst9_w5R", "rst10_w5",
"rst14_w5"), parameterization = "theta", missing = "pairwise", mimic =
"Mplus")
```

# Show fit measures:

```
summary(fit_rst_model_free, fit.measures = TRUE)
```

## **Confirmatory factor analysis with free inter-factor correlations and single r-FFFS scale using *lavaan***

```
# Model definition:
```

```
rst_model_fffs <- 'r_BIS =~ rst2_w5 + rst4_w5 + rst7_w5 + rst8_w5 + rst11_w5  
                    + rst21_w5R + rst23_w5 + rst26_w5 + rst28_w5  
                    + rst29_w5 + rst30_w5  
                    r_BAS =~ rst1_w5 + rst5_w5 + rst12_w5 + rst13_w5  
                    + rst18_w5 + rst24_w5 + rst25_w5 + rst31_w5  
                    r_FFFS =~ rst3_w5 + rst9_w5R + rst10_w5 + rst14_w5  
                    + rst6_w5 + rst19_w5 + rst20_w5 + rst15_w5R  
                    + rst16_w5R + rst17_w5 + rst22_w5 + rst27_w5  
# Interfactor correlations  
    r_BIS ~~ r_BAS + r_FFFS  
    r_BAS ~~ r_FFFS'
```

```
# Run CFA model:
```

```
fit_rst_model_fffs <- cfa(rst_model_fffs, data = w5_rstR, ordered =  
c("rst2_w5", "rst4_w5", "rst7_w5", "rst8_w5", "rst11_w5", "rst21_w5R",  
"rst23_w5", "rst26_w5", "rst28_w5", "rst29_w5", "rst30_w5", "rst1_w5",  
"rst5_w5", "rst12_w5", "rst13_w5", "rst18_w5", "rst24_w5", "rst25_w5",  
"rst31_w5", "rst15_w5R", "rst16_w5R", "rst17_w5", "rst22_w5", "rst27_w5",  
"rst6_w5", "rst19_w5", "rst20_w5", "rst3_w5", "rst9_w5R", "rst10_w5",  
"rst14_w5"), parameterization = "theta", mimic = "Mplus")  
# Show fit measures:  
summary(fit_rst_model_fffs, fit.measures = TRUE)
```

### **Multiple-groups confirmatory factor analysis gender invariance using *lavaan***

Response level 1 (“strongly disagree”) for item 24 from the rBAS scale was only observed in three females. Thus to run gender invariance, level 1 responses were collapsed to level 2 (“disagree”) in a new variable (rst24\_w5C, below). This model with collapsed item 24 had virtually identical fit measures to the model with free inter-factor correlations ( $\chi^2 = 2830.71$ , degrees of freedom = 424, Comparative fit index = 0.947, Tucker-Lewis index = 0.942, Root mean square error of approximation (90% confidence interval) = 0.067 (0.065-0.070)).

# Model definition:

```
rst_model_col24 <- 'rBIS =~ rst2_w5 + rst4_w5 + rst7_w5 + rst8_w5 + rst11_w5
                    + rst21_w5R + rst23_w5 + rst26_w5 + rst28_w5
                    + rst29_w5 + rst30_w5
rBAS =~ rst1_w5 + rst5_w5 + rst12_w5 + rst13_w5
        + rst18_w5 + rst24_w5C + rst25_w5 + rst31_w5
rFFFS_fi =~ rst15_w5R + rst16_w5R + rst17_w5 + rst22_w5
          + rst27_w5
rFFFS_fl =~ rst6_w5 + rst19_w5 + rst20_w5
rFFFS_fr =~ rst3_w5 + rst9_w5R + rst10_w5 + rst14_w5
# Interfactor correlations
rBIS ~~ rBAS + rFFFS_fi + rFFFS_fl + rFFFS_fr
rBAS ~~ rFFFS_fi + rFFFS_fl + rFFFS_fr
rFFFS_fi ~~ rFFFS_fl + rFFFS_fr
rFFFS_fl ~~ rFFFS_fr'
```

# Check model fit with collapsed item:

```
fit_rst_model_col24 <- cfa(rst_model_col24, data = path_w5, ordered =
c("rst2_w5", "rst4_w5", "rst7_w5", "rst8_w5", "rst11_w5", "rst21_w5R",
"rst23_w5", "rst26_w5", "rst28_w5", "rst29_w5", "rst30_w5", "rst1_w5",
"rst5_w5", "rst12_w5", "rst13_w5", "rst18_w5", "rst24_w5C", "rst25_w5",
"rst31_w5", "rst15_w5R", "rst16_w5R", "rst17_w5", "rst22_w5", "rst27_w5",
"rst6_w5", "rst19_w5", "rst20_w5", "rst3_w5", "rst9_w5R", "rst10_w5",
"rst14_w5"), parameterization = "theta", missing = "pairwise", mimic =
"Mplus")
```

# show fit measures:

```
summary(fit_rst_model_col24, fit.measures = TRUE)
```

```
# Measurement invariance model 1: configural invariance
```

```
sex.fit_rst_model1C <- cfa(rst_model_col24, data = path_w5, ordered =  
c("rst2_w5", "rst4_w5", "rst7_w5", "rst8_w5", "rst11_w5", "rst21_w5R",  
"rst23_w5", "rst26_w5", "rst28_w5", "rst29_w5", "rst30_w5", "rst1_w5",  
"rst5_w5", "rst12_w5", "rst13_w5", "rst18_w5", "rst24_w5C", "rst25_w5",  
"rst31_w5", "rst15_w5R", "rst16_w5R", "rst17_w5", "rst22_w5", "rst27_w5",  
"rst6_w5", "rst19_w5", "rst20_w5", "rst3_w5", "rst9_w5R", "rst10_w5",  
"rst14_w5"), parameterization = "theta", missing = "pairwise", group =  
"gender_w5", mimic = "Mplus")
```

```
# Show fit measures:
```

```
summary(sex.fit_rst_model1C, fit.measures = TRUE)
```

```
# Measurement invariance model 2: threshold invariance
```

```
sex.fit_rst_model2C <- cfa(rst_model_col24, data = path_w5, ordered =  
c("rst2_w5", "rst4_w5", "rst7_w5", "rst8_w5", "rst11_w5", "rst21_w5R",  
"rst23_w5", "rst26_w5", "rst28_w5", "rst29_w5", "rst30_w5", "rst1_w5",  
"rst5_w5", "rst12_w5", "rst13_w5", "rst18_w5", "rst24_w5C", "rst25_w5",  
"rst31_w5", "rst15_w5R", "rst16_w5R", "rst17_w5", "rst22_w5", "rst27_w5",  
"rst6_w5", "rst19_w5", "rst20_w5", "rst3_w5", "rst9_w5R", "rst10_w5",  
"rst14_w5"), parameterization = "theta", missing = "pairwise", group =  
"gender_w5", group.equal = c("thresholds"), mimic = "Mplus")
```

```
# Show fit measures:
```

```
summary(sex.fit_rst_model2C, fit.measures = TRUE)
```

```
# Measurement invariance model 3: loading invariance
```

```
sex.fit_rst_model3C <- cfa(rst_model_col24, data = path_w5, ordered =  
c("rst2_w5", "rst4_w5", "rst7_w5", "rst8_w5", "rst11_w5", "rst21_w5R",  
"rst23_w5", "rst26_w5", "rst28_w5", "rst29_w5", "rst30_w5", "rst1_w5",  
"rst5_w5", "rst12_w5", "rst13_w5", "rst18_w5", "rst24_w5C", "rst25_w5",  
"rst31_w5", "rst15_w5R", "rst16_w5R", "rst17_w5", "rst22_w5", "rst27_w5",  
"rst6_w5", "rst19_w5", "rst20_w5", "rst3_w5", "rst9_w5R", "rst10_w5",  
"rst14_w5"), parameterization = "theta", missing = "pairwise", group =  
"gender_w5", group.equal = c("thresholds", "loadings"), mimic = "Mplus")
```

Doi: <https://doi.org/10.1027/1864-9335/a000502>

```
# Show fit measures:
```

```
summary(sex.fit_rst_model3C, fit.measures = TRUE)
```

## Supplement Table E1

### *Reuter and Montag's rRST-Q item description*

|                                                                                                                                                                                                                                                                                                                                                                                                                                                                                                                                                                                                                                                                                                                                                                                             |
|---------------------------------------------------------------------------------------------------------------------------------------------------------------------------------------------------------------------------------------------------------------------------------------------------------------------------------------------------------------------------------------------------------------------------------------------------------------------------------------------------------------------------------------------------------------------------------------------------------------------------------------------------------------------------------------------------------------------------------------------------------------------------------------------|
| <p><b>rBIS</b></p> <p>2. I'm often glad if someone makes decisions for me.</p> <p>4. I often doubt if my efforts will pay off.</p> <p>7. If I have the choice between two appealing options, I have difficulty deciding on one.</p> <p>8. My friends think of me as an indecisive person.</p> <p>11. I find it hard to bear uncertainty.</p> <p>21. I don't have problems deciding on a dish in a restaurant.</p> <p>23. I often don't know what I want.</p> <p>26. When faced with two unpleasant alternatives, it is difficult for me to decide on the lesser of two evils.</p> <p>28. I often feel torn between two options.</p> <p>29. I worry greatly before a difficult or important test.</p> <p>30. I usually carefully weigh up the options before making important decisions.</p> |
| <p><b>rBAS</b></p> <p>1. I'm a spontaneous person.</p> <p>5. Most of the time I have a thirst for action.</p> <p>12. I often take risks.</p> <p>13. I'm easily inspired by new things.</p> <p>18. Whoever dares wins.</p> <p>24. I get fired up when I see the chance to achieve something.</p> <p>25. I am an outgoing person.</p> <p>31. When offered a good opportunity, I take it without hesitating.</p>                                                                                                                                                                                                                                                                                                                                                                               |
| <p><b>FFFS: Fight</b></p> <p>15. Most of the time, I cannot defend myself if I am criticized.</p> <p>16. To avoid worse things happening, I would rather give in.</p> <p>17. Attack is the best form of defence.</p> <p>22. I am a rather quick-witted person.</p> <p>27. In general, I stand up for myself.</p>                                                                                                                                                                                                                                                                                                                                                                                                                                                                            |
| <p><b>FFFS: Flight</b></p> <p>6. When faced with danger, I tend to flee.</p> <p>19. I usually avoid confrontations.</p> <p>20. When an unpleasant event is inevitable, I'm thrown into a state of panic.</p>                                                                                                                                                                                                                                                                                                                                                                                                                                                                                                                                                                                |
| <p><b>FFFS: Freezing</b></p> <p>3. I often feel paralysed when in a dangerous situation.</p> <p>9. I usually approach unpleasant tasks without hesitation.</p> <p>10. I will gladly let unpleasant tasks slip by.</p> <p>14. I like sitting unpleasant things out.</p>                                                                                                                                                                                                                                                                                                                                                                                                                                                                                                                      |

*Note:* rBIS: Revised behavioural inhibition system, rBAS: Revised behavioural approach/activation system, FFFS: Fight-flight-freeze system.



## Supplement Table E2

### *Carver and White's BIS/BAS item description*

|                                                                                                                                                                                                                                                                                                                                                                                                                                                                                                   |
|---------------------------------------------------------------------------------------------------------------------------------------------------------------------------------------------------------------------------------------------------------------------------------------------------------------------------------------------------------------------------------------------------------------------------------------------------------------------------------------------------|
| <b>BIS</b>                                                                                                                                                                                                                                                                                                                                                                                                                                                                                        |
| 1. I have very few fears compared to my friends.<br>2. Criticism or scolding hurts me quite a bit.<br>3. I feel pretty worried or upset when I think or know somebody is angry at me.<br>4. If I think something unpleasant is going to happen I usually get pretty "worked-up".<br>5. I feel worried when I think I have done poorly at something important.<br>6. Even if something bad is about to happen to me, I rarely experience fear or nervousness.<br>7. I worry about making mistakes. |
| <b>BAS: Drive</b>                                                                                                                                                                                                                                                                                                                                                                                                                                                                                 |
| 8. I go out of my way to get things I want.<br>9. When I want something I usually go all-out to get it.<br>10. If I see a chance to get something I want I move on it right away.<br>11. When I go after something, I use a "no holds barred" approach.                                                                                                                                                                                                                                           |
| <b>BAS: Fun-seeking</b>                                                                                                                                                                                                                                                                                                                                                                                                                                                                           |
| 12. I'm always willing to try something new if I think it will be fun.<br>13. I will often do things for no other reason than that they might be fun.<br>14. I often act on the spur of the moment.<br>15. I crave excitement and new sensations.                                                                                                                                                                                                                                                 |
| <b>BAS: Reward responsiveness</b>                                                                                                                                                                                                                                                                                                                                                                                                                                                                 |
| 16. When I'm doing well at something, I love to keep at it.<br>17. When I get something I want, I feel excited and energised.<br>18. When I see an opportunity for something I like I get excited right away.<br>19. When good things happen to me, it affects me greatly.<br>20. It would excite me to win a contest.                                                                                                                                                                            |

*Note.* BIS: Behavioural inhibition system, BAS: Behavioural approach/activation system.

### Supplement Table E3

*Model specifications for measurement invariance*

|                     | <b>Model</b>      |                  |                |
|---------------------|-------------------|------------------|----------------|
|                     | <b>Configural</b> | <b>Threshold</b> | <b>Loading</b> |
| <b>Intercepts</b>   | 0                 | 0                | 0              |
| <b>Residual</b>     |                   |                  |                |
| <b>Variances</b>    | 1                 | 1*               | 1*             |
| <b>Factor</b>       |                   |                  |                |
| <b>Variances</b>    | Free              | Free             | Free           |
| <b>Factor Means</b> | 0                 | 0*               | 0*             |
| <b>Thresholds</b>   | Free              | Equal            | Equal          |
| <b>Loadings</b>     | Free              | Free             | Equal          |

*Note.* Free: Freely estimated measure. 0: Measure set to 0. 1: Measure set to 1. 0\*: Factor means were set to 0 in males, and freely estimated in females. 1\*: Residual variances were set to 1 in males, and freely estimated in females. Equal: Measure constrained to be equal among genders. Factor variances are freely estimated since latent factor metric has been set using marker variables.

## Supplement Results

### Supplement Table E4

*Loading structure and inter-factor correlations of rRST-Q*

|                                  |                 | <b>Estimate</b> | <b>SE</b> |
|----------------------------------|-----------------|-----------------|-----------|
| <b>rBIS</b>                      | <b>item 2</b>   | <b>1</b>        | <b>0</b>  |
|                                  | item 4          | 1.163           | .104      |
|                                  | item 7          | 1.483           | .127      |
|                                  | item 8          | 1.896           | .163      |
|                                  | item 11         | .781            | .081      |
|                                  | item 21†        | .778            | .076      |
|                                  | item 23         | 1.812           | .151      |
|                                  | item 26         | 1.556           | .137      |
|                                  | item 28         | 1.829           | .160      |
|                                  | item 29         | 1.312           | .112      |
|                                  | item 30         | .095            | .055      |
| <b>rBAS</b>                      | <b>item 1</b>   | <b>1</b>        | <b>0</b>  |
|                                  | item 5          | 1.054           | .096      |
|                                  | item 12         | 1.076           | .098      |
|                                  | item 13         | .751            | .080      |
|                                  | item 18         | .491            | .061      |
|                                  | item 24         | 1.092           | .107      |
|                                  | item 25         | 1.313           | .125      |
|                                  | item 31         | .780            | .075      |
| <b>FFFS: Fight</b>               | <b>item 15†</b> | <b>1</b>        | <b>0</b>  |
|                                  | item 16†        | .987            | .067      |
|                                  | item 17         | .118            | .032      |
|                                  | item 22         | .491            | .041      |
|                                  | item 27         | .928            | .075      |
| <b>FFFS: Flight</b>              | <b>item 6</b>   | <b>1</b>        | <b>0</b>  |
|                                  | item 19         | 1.072           | .080      |
|                                  | item 20         | 1.528           | .113      |
| <b>FFFS: Freeze</b>              | <b>item 3</b>   | <b>1</b>        | <b>0</b>  |
|                                  | item 9†         | .438            | .056      |
|                                  | item 10         | .520            | .063      |
|                                  | item 14         | .359            | .049      |
| <b>Inter-factor correlations</b> |                 |                 |           |
| <b>rBIS</b>                      | r-BAS           | -.160           | .021      |
|                                  | Fight           | -.483           | .046      |
|                                  | Flight          | .352            | .032      |
|                                  | Freeze          | .538            | .059      |
| <b>rBAS</b>                      | Fight           | .499            | .048      |
|                                  | Flight          | -.270           | .030      |
|                                  | Freeze          | -.328           | .049      |
| <b>FFFS: Fight</b>               | Flight          | -.759           | .059      |
|                                  | Freeze          | -.859           | .094      |
| <b>FFFS: Flight</b>              | Freeze          | .868            | .083      |

*Note.* rBIS: Revised behavioural inhibition system, rBAS: revised behavioural approach/activation system, FFFS: Fight-flight-freeze system, SE: Standard error. Please refer

Doi: <https://doi.org/10.1027/1864-9335/a000502>

to Supplement Table 1 for item description. Bolded items represent marker variables. †:  
Reverse-coded item.

**Supplement Table E5**

*Loading structure and inter-factor correlations of rRST-Q excluding items 17 and 30*

|                                  |                 | <b>Estimate</b> | <b>SE</b> |
|----------------------------------|-----------------|-----------------|-----------|
| <b>rBIS</b>                      | <b>item 2</b>   | <b>1</b>        | <b>0</b>  |
|                                  | item 4          | 1.168           | .104      |
|                                  | item 7          | 1.481           | .127      |
|                                  | item 8          | 1.897           | .163      |
|                                  | item 11         | .782            | .081      |
|                                  | item 21†        | .778            | .076      |
|                                  | item 23         | 1.816           | .151      |
|                                  | item 26         | 1.558           | .137      |
|                                  | item 28         | 1.831           | .160      |
|                                  | item 29         | 1.311           | .112      |
| <b>rBAS</b>                      | <b>item 1</b>   | <b>1</b>        | <b>0</b>  |
|                                  | item 5          | 1.050           | .096      |
|                                  | item 12         | 1.073           | .098      |
|                                  | item 13         | .755            | .080      |
|                                  | item 18         | .478            | .060      |
|                                  | item 24         | 1.096           | .107      |
|                                  | item 25         | 1.315           | .125      |
|                                  | item 31         | .782            | .075      |
| <b>FFFS: Fight</b>               | <b>item 15†</b> | <b>1</b>        | <b>0</b>  |
|                                  | item 16†        | .988            | .067      |
|                                  | item 22         | .490            | .041      |
|                                  | item 27         | .928            | .074      |
| <b>FFFS: Flight</b>              | <b>item 6</b>   | <b>1</b>        | <b>0</b>  |
|                                  | item 19         | 1.067           | 0.080     |
|                                  | item 20         | 1.538           | 0.114     |
| <b>FFFS: Freeze</b>              | <b>item 3</b>   | <b>1</b>        | <b>0</b>  |
|                                  | item 9†         | .438            | .056      |
|                                  | item 10         | .522            | .063      |
|                                  | item 14         | .360            | .049      |
| <b>Inter-factor correlations</b> |                 |                 |           |
| <b>rBIS</b>                      | r-BAS           | -.160           | .021      |
|                                  | Fight           | -.487           | .046      |
|                                  | Flight          | .352            | .032      |
|                                  | Freeze          | .537            | .059      |
| <b>rBAS</b>                      | Fight           | .494            | .048      |
|                                  | Flight          | -.270           | .030      |
|                                  | Freeze          | -.328           | .049      |
| <b>FFFS: Fight</b>               | Flight          | -.756           | .059      |
|                                  | Freeze          | -.860           | .093      |
| <b>FFFS: Flight</b>              | Freeze          | .866            | .082      |

*Note.* rBIS: Revised behavioural inhibition system, rBAS: Revised behavioural approach/activation system, FFFS: Fight-flight-freeze system, *SE*: Standard error. Please refer to Supplement Table 1 for item description. Bolded items represent marker variables. †: Reverse-coded item.

**Supplement Table E6**

*Loading structure for the fully invariant sex model of rRST-Q*

|                     |                 | <b>Estimate</b> | <b>SE</b> |
|---------------------|-----------------|-----------------|-----------|
| <b>rBIS</b>         | <b>item 2</b>   | <b>1</b>        | <b>0</b>  |
|                     | item 4          | 1.402           | .162      |
|                     | item 7          | 1.633           | .187      |
|                     | item 8          | 2.463           | .313      |
|                     | item 11         | .882            | .109      |
|                     | item 21†        | .815            | .102      |
|                     | item 23         | 2.016           | .232      |
|                     | item 26         | 1.770           | .208      |
|                     | item 28         | 2.054           | .247      |
|                     | item 29         | 1.343           | .156      |
| <b>rBAS</b>         | <b>item 1</b>   | <b>1</b>        | <b>0</b>  |
|                     | item 5          | 1.050           | .115      |
|                     | item 12         | .927            | .095      |
|                     | item 13         | .717            | .082      |
|                     | item 18         | .432            | .065      |
|                     | item 24         | 1.001           | .124      |
|                     | item 25         | 1.700           | .215      |
|                     | item 31         | .806            | .091      |
| <b>FFFS: Fight</b>  | <b>item 15†</b> | <b>1</b>        | <b>0</b>  |
|                     | item 16†        | .885            | .098      |
|                     | item 22         | .066            | .031      |
|                     | item 27         | .447            | .052      |
| <b>FFFS: Flight</b> | <b>item 6</b>   | <b>1</b>        | <b>0</b>  |
|                     | item 19         | 1.048           | .098      |
|                     | item 20         | 1.276           | .138      |
| <b>FFFS: Freeze</b> | <b>item 3</b>   | <b>1</b>        | <b>0</b>  |
|                     | item 9†         | .481            | .080      |
|                     | item 10         | .630            | .103      |
|                     | item 14         | .478            | .082      |

*Note.* rBIS: Revised behavioural inhibition system, rBAS: Revised behavioural approach/activation system, FFFS: Fight-flight-freeze system, SE: Standard error. Please refer to Supplement Table 1 for item description. †: Reverse-coded item.

**Supplement Table E7**

*Inter-factor correlations for the fully invariant sex model of rRST-Q*

|                |               | rBIS        | rBAS        | Fight       | Flight     | Freeze |
|----------------|---------------|-------------|-------------|-------------|------------|--------|
| <b>Males</b>   | <b>rBIS</b>   | 1           |             |             |            |        |
|                | <b>rBAS</b>   | -.14        | 1           |             |            |        |
|                | <b>Fight</b>  | <b>-.41</b> | <b>.48</b>  | 1           |            |        |
|                | <b>Flight</b> | <b>.32</b>  | <b>-.31</b> | <b>-.82</b> | 1          |        |
|                | <b>Freeze</b> | <b>.43</b>  | <b>-.30</b> | <b>-.78</b> | <b>.84</b> | 1      |
| <b>Females</b> | <b>r-BIS</b>  | 1           |             |             |            |        |
|                | <b>rBAS</b>   | -.14        | 1           |             |            |        |
|                | <b>Fight</b>  | <b>-.43</b> | <b>.54</b>  | 1           |            |        |
|                | <b>Flight</b> | <b>.32</b>  | <b>-.27</b> | <b>-.81</b> | 1          |        |
|                | <b>Freeze</b> | <b>.38</b>  | <b>-.27</b> | <b>-.71</b> | <b>.75</b> | 1      |

*Note.* rBIS: Revised behavioural inhibition system, rBAS: revised behavioural approach/activation system. Bold font indicates  $r \geq .3$ .

**Supplement Table E8**

*Threshold structure for the fully invariant sex model of rRST-Q*

|             |           | <b>Threshold</b> | <b>Estimate</b> | <b>SE</b> |
|-------------|-----------|------------------|-----------------|-----------|
| <b>rBIS</b> | Item 2    | <b>t1</b>        | -1.203          | .091      |
|             | Item 2    | <b>t2</b>        | .431            | .047      |
|             | Item 2    | <b>t3</b>        | 2.052           | .158      |
|             | Item 4    | <b>t1</b>        | -.875           | .077      |
|             | Item 4    | <b>t2</b>        | 1.173           | .071      |
|             | Item 4    | <b>t3</b>        | 2.929           | .163      |
|             | Item 7    | <b>t1</b>        | -2.204          | .139      |
|             | Item 7    | <b>t2</b>        | -.239           | .056      |
|             | Item 7    | <b>t3</b>        | 1.828           | .127      |
|             | Item 8    | <b>t1</b>        | -1.053          | .114      |
|             | Item 8    | <b>t2</b>        | 1.824           | .163      |
|             | Item 8    | <b>t3</b>        | 3.869           | .347      |
|             | Item 11   | <b>t1</b>        | -1.700          | .097      |
|             | Item 11   | <b>t2</b>        | .061            | .043      |
|             | Item 11   | <b>t3</b>        | 1.803           | .099      |
|             | Item 21†  | <b>t1</b>        | -.917           | .067      |
|             | Item 21†  | <b>t2</b>        | .560            | .046      |
|             | Item 21†  | <b>t3</b>        | 1.829           | .117      |
|             | Item 23   | <b>t1</b>        | -1.659          | .140      |
|             | Item 23   | <b>t2</b>        | 1.026           | .083      |
|             | Item 23   | <b>t3</b>        | 3.009           | .204      |
|             | Item 26   | <b>t1</b>        | -2.179          | .142      |
|             | Item 26   | <b>t2</b>        | .602            | .069      |
|             | Item 26   | <b>t3</b>        | 3.259           | .231      |
|             | Item 28   | <b>t1</b>        | -2.505          | .173      |
|             | Item 28   | <b>t2</b>        | .547            | .074      |
|             | Item 28   | <b>t3</b>        | 2.998           | .225      |
|             | Item 29   | <b>t1</b>        | -1.937          | .119      |
|             | Item 29   | <b>t2</b>        | -.100           | .051      |
|             | Item 29   | <b>t3</b>        | 1.500           | .099      |
| Item 30     | <b>t1</b> | -2.698           | .182            |           |
| Item 30     | <b>t2</b> | -1.540           | .078            |           |
| Item 30     | <b>t3</b> | .458             | .041            |           |
| <b>rBAS</b> | Item 1    | <b>t1</b>        | -2.227          | .138      |
|             | Item 1    | <b>t2</b>        | -.058           | .055      |
|             | Item 1    | <b>t3</b>        | 1.944           | .130      |
|             | Item 5    | <b>t1</b>        | -2.158          | .144      |
|             | Item 5    | <b>t2</b>        | -.138           | .056      |
|             | Item 5    | <b>t3</b>        | 2.066           | .141      |
|             | Item 12   | <b>t1</b>        | -1.968          | .130      |
|             | Item 12   | <b>t2</b>        | .324            | .055      |
|             | Item 12   | <b>t3</b>        | 2.212           | .131      |
|             | Item 13   | <b>t1</b>        | -3.096          | .247      |
| Item 13     | <b>t2</b> | -1.212           | .082            |           |
| <b>rBAS</b> | Item 13   | <b>t3</b>        | 1.117           | .080      |
|             | Item 18   | <b>t1</b>        | -1.830          | .120      |



|                         |                        | <b>Threshold</b> | <b>Estimate</b> | <b>SE</b> |      |
|-------------------------|------------------------|------------------|-----------------|-----------|------|
|                         | Item 18                | <b>t2</b>        | -.069           | .039      |      |
| <b>rBAS</b>             | Item 18                | <b>t3</b>        | 1.833           | .101      |      |
|                         | Item 24‡               | <b>t1</b>        | -1.156          | .096      |      |
|                         | Item 24‡               | <b>t2</b>        | 1.334           | .109      |      |
|                         | Item 25                | <b>t1</b>        | -3.080          | .293      |      |
|                         | Item 25                | <b>t2</b>        | -.697           | .100      |      |
|                         | Item 25                | <b>t3</b>        | 1.985           | .198      |      |
|                         | Item 31                | <b>t1</b>        | -2.994          | .180      |      |
|                         | Item 31                | <b>t2</b>        | -.674           | .059      |      |
|                         | Item 31                | <b>t3</b>        | 1.417           | .097      |      |
|                         | <b>FFFS:<br/>Fight</b> | Item 15†         | <b>t1</b>       | -3.310    | .275 |
| Item 15†                |                        | <b>t2</b>        | -1.806          | .151      |      |
| Item 15†                |                        | <b>t3</b>        | .824            | .089      |      |
| Item 16†                |                        | <b>t1</b>        | -3.300          | .199      |      |
| Item 16†                |                        | <b>t2</b>        | -.971           | .076      |      |
| Item 16†                |                        | <b>t3</b>        | 1.149           | .101      |      |
| Item 17                 |                        | <b>t1</b>        | -1.020          | .061      |      |
| Item 17                 |                        | <b>t2</b>        | .766            | .047      |      |
| Item 17                 |                        | <b>t3</b>        | 1.949           | .095      |      |
| Item 22                 |                        | <b>t1</b>        | -2.367          | .175      |      |
| Item 22                 |                        | <b>t2</b>        | -.800           | .066      |      |
| Item 22                 |                        | <b>t3</b>        | 1.076           | .073      |      |
| Item 27                 |                        | <b>t1</b>        | -3.526          | .286      |      |
| Item 27                 |                        | <b>t2</b>        | -1.918          | .146      |      |
| Item 27                 |                        | <b>t3</b>        | .941            | .091      |      |
| <b>FFFS:<br/>Flight</b> |                        | Item 6           | <b>t1</b>       | -1.392    | .091 |
|                         |                        | Item 6           | <b>t2</b>       | .938      | .082 |
|                         |                        | Item 6           | <b>t3</b>       | 2.978     | .210 |
|                         | Item 19                | <b>t1</b>        | -2.078          | .142      |      |
|                         | Item 19                | <b>t2</b>        | -.111           | .060      |      |
|                         | Item 19                | <b>t3</b>        | 1.837           | .106      |      |
|                         | Item 20                | <b>t1</b>        | -.873           | .092      |      |
|                         | Item 20                | <b>t2</b>        | 1.517           | .123      |      |
|                         | Item 20                | <b>t3</b>        | 2.961           | .239      |      |
| <b>FFFS:<br/>Freeze</b> | Item 3                 | <b>t1</b>        | -.818           | .120      |      |
|                         | Item 3                 | <b>t2</b>        | 1.493           | .192      |      |
|                         | Item 3                 | <b>t3</b>        | 3.065           | .395      |      |
|                         | Item 9†                | <b>t1</b>        | -2.042          | .135      |      |
|                         | Item 9†                | <b>t2</b>        | -.015           | .047      |      |
|                         | Item 9†                | <b>t3</b>        | 2.062           | .126      |      |
|                         | Item 10                | <b>t1</b>        | -2.144          | .148      |      |
|                         | Item 10                | <b>t2</b>        | .340            | .057      |      |
|                         | Item 10                | <b>t3</b>        | 2.464           | .159      |      |
|                         | Item 14                | <b>t1</b>        | -2.298          | .154      |      |
|                         | Item 14                | <b>t2</b>        | .048            | .051      |      |

|         | <b>Threshold</b> | <b>Estimate</b> | <b>SE</b> |
|---------|------------------|-----------------|-----------|
| Item 14 | <b>t3</b>        | 2.534           | .150      |

*Note.* rBIS: Revised behavioural inhibition system, rBAS: Revised behavioural approach/activation system, FFFS: Fight-flight-freezing system, *SE*: Standard error. Please refer to Supplement Table 1 for item description. †: Reverse-coded item. ‡ Collapsed item.

### Supplement Figure E1

*Confirmatory factor analysis of rRST-Q excluding items 17 and 30*

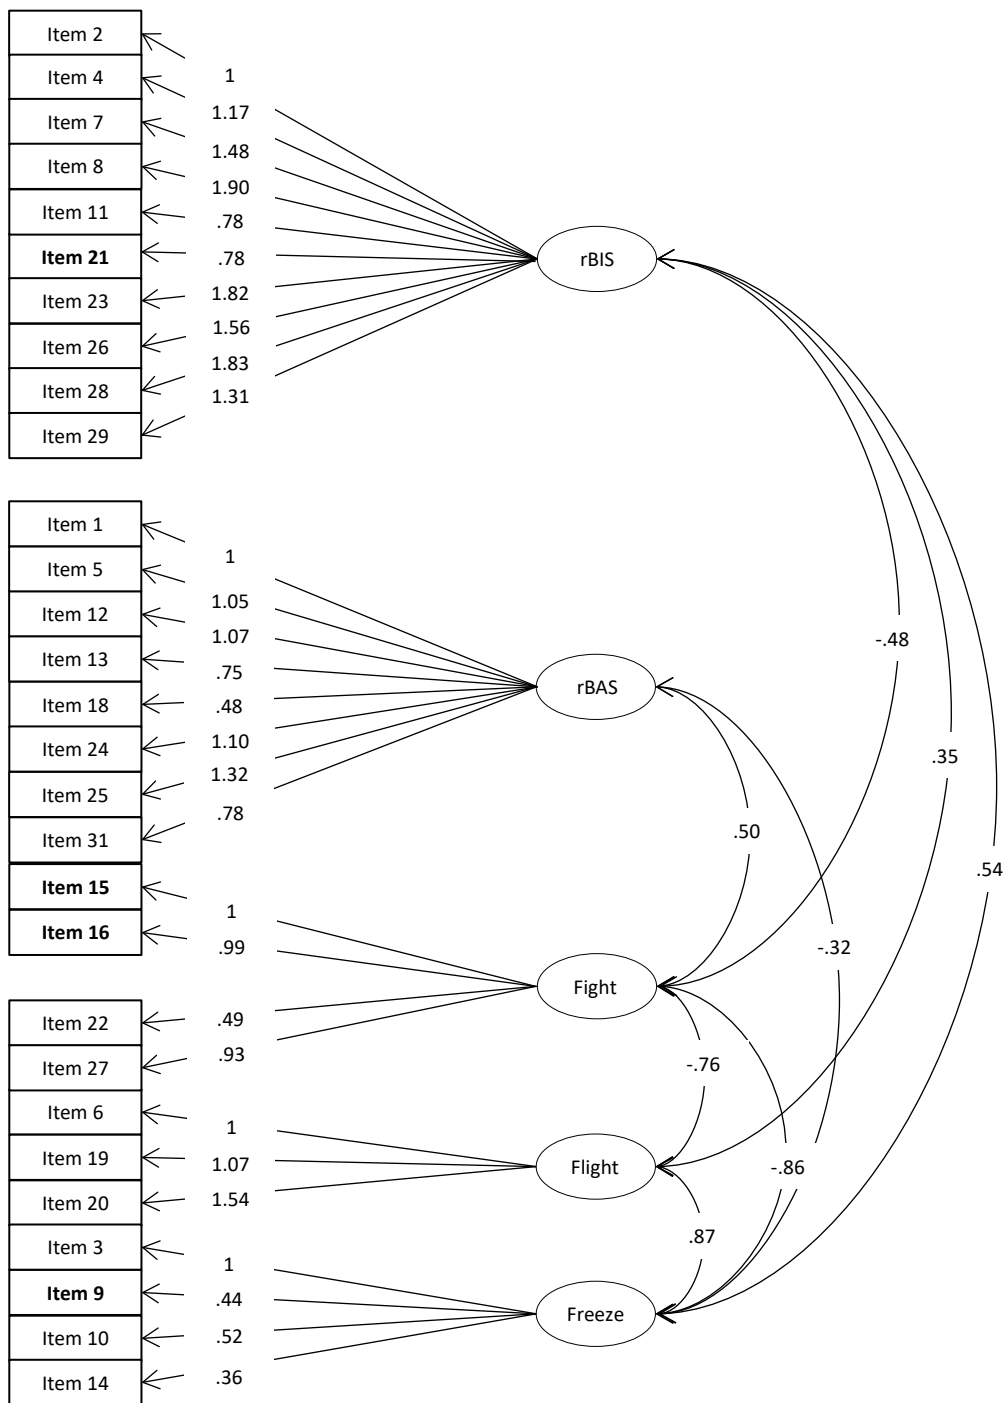

**$n = 1,259$**   
 **$\chi^2 p < .0001$**   
**CFI = .96**  
**TLI = .95**  
**RMSEA (90% CI) = .066 (.063-.068)**

Doi: <https://doi.org/10.1027/1864-9335/a000502>

*Note.* rBIS: Revised behavioural inhibition system, rBAS: Revised behavioural approach/activation system,  $n$ : Sample size,  $\chi^2$ : Chi-square value, *CFI*: Comparative fit index, *TLI*: Tucker-Lewis index, *RMSEA*: Root mean square error of approximation, *CI*: Confidence interval. Inter-factor correlations  $\pm < .32$  have been omitted. Items in bold font are reverse-coded.

## Supplement Figure E2

*Correlation heat-map of original BIS/BAS, EPQ-R, and GADS*

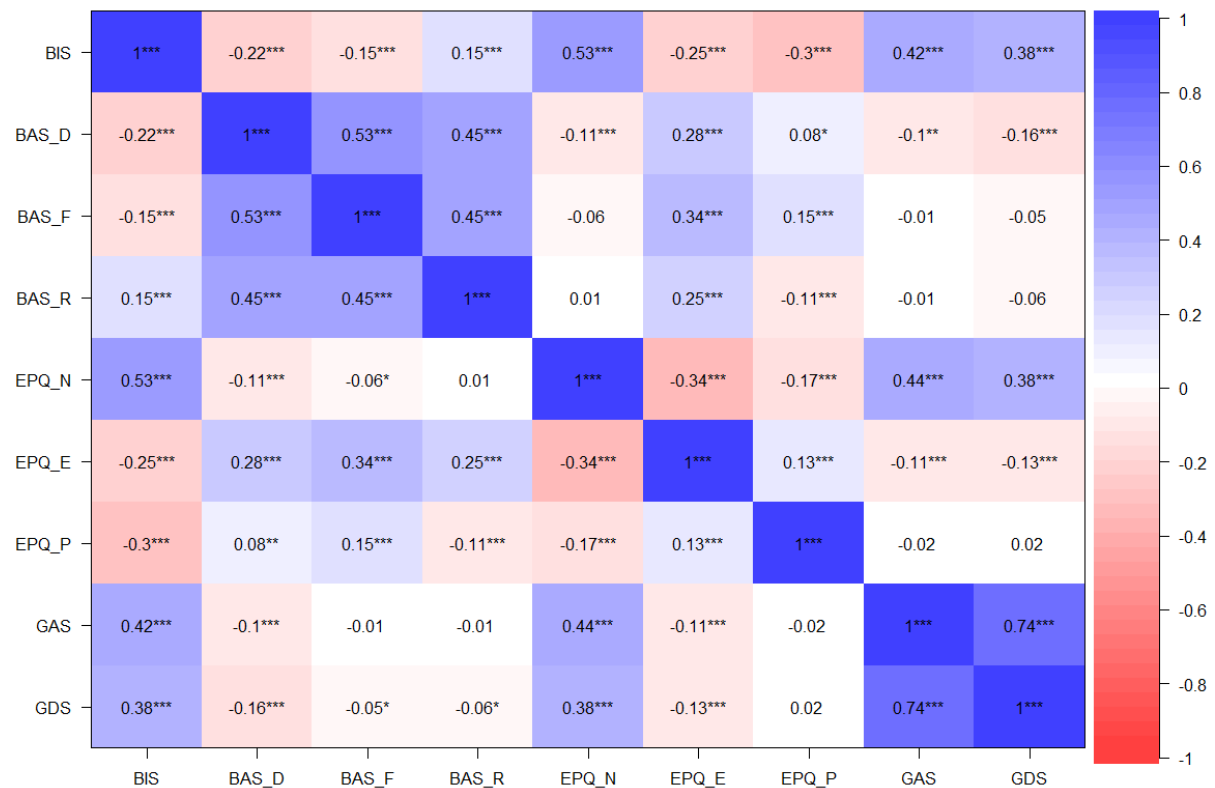

*Note.* BIS: Behavioural inhibition system, BAS: Behavioural approach/activation system, BAS\_D: Drive, BAS\_F: Fun-seeking, BAS\_R: Reward responsiveness, EPQ: Eysenck personality questionnaire, EPQ\_N: Neuroticism, EPQ\_E: Extraversion, EPQ\_P: Psychoticism, GAS: Goldberg anxiety, GDS: Goldberg depression. Far right bar shows value of correlation.

\*:  $p \leq .05$ , \*\*:  $p \leq .01$ , \*\*\*:  $p \leq .001$

### Supplement Figure E3

*Correlation heat-map of revised BIS/BAS/FFFS fear, EPQ-R, and GADS*

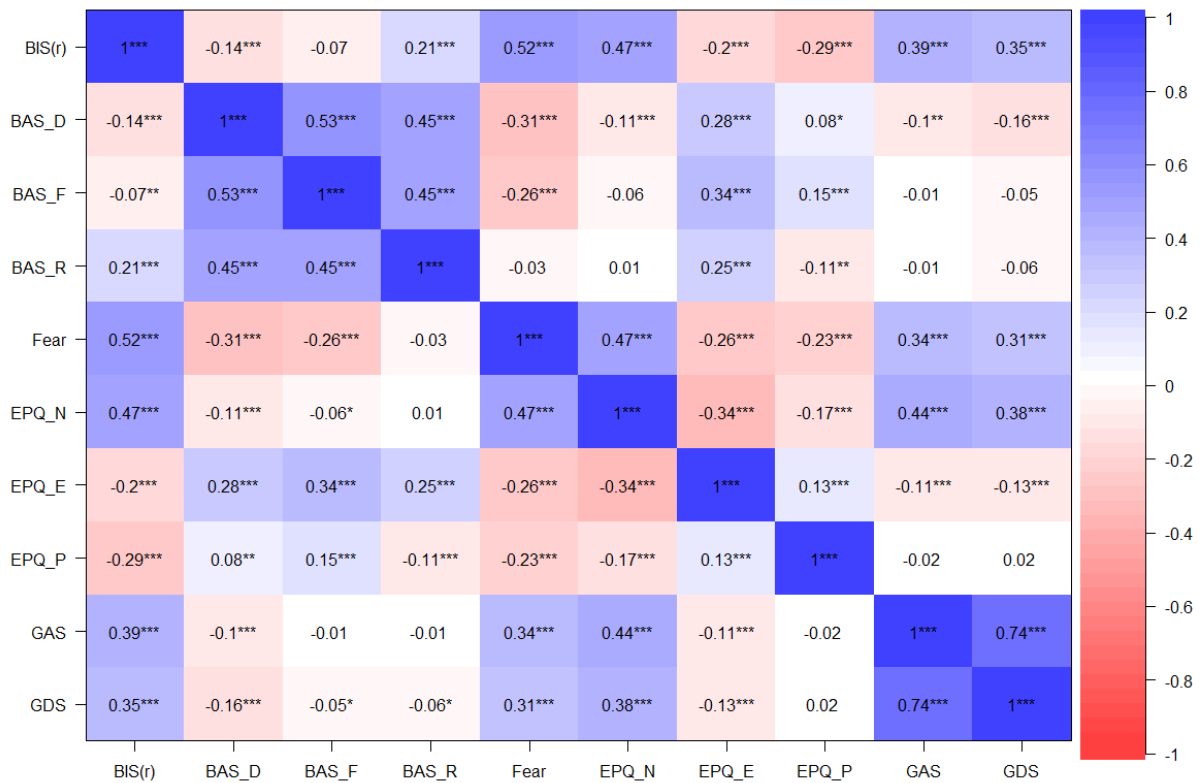

*Note.* BIS(r): Behavioural inhibition system (revised), BAS: Behavioural approach/activation system, BAS\_D: Drive, BAS\_F: Fun-seeking, BAS\_R: Reward responsiveness, Fear: Fight-flight-freeze fear, EPQ: Eysenck personality questionnaire, EPQ\_N: Neuroticism, EPQ\_E: Extraversion, EPQ\_P: Psychoticism, GAS: Goldberg anxiety, GDS: Goldberg depressions. Far right bar shows value of correlation. \*:  $p \leq .05$ , \*\*:  $p \leq .01$ , \*\*\*:  $p \leq .001$
